# Supplementary material for: Bioorthogonal reaction-mediated photosensitizer–peptide conjugate anchoring on cell membranes for enhanced photodynamic therapy
Source: Royal Society of Chemistry journal article supplement (doi:10.1039/d4bm01602e), 2025-01-01
Supplement: d4bm01602e1.pdf [file d4bm01602e1.pdf]

*Supporting Information for*

## **Bioorthogonal Reaction-Mediated Photosensitizer-Peptide Conjugate Anchoring on Cell Membranes for Enhanced Photodynamic Therapy**

Buwei Hu<sup>1,3</sup>, Chenlin Ji<sup>3,4</sup>, Zhuohang Zhou<sup>3</sup>, Xuehan Xu<sup>3,4</sup>, Luyi Wang<sup>3,4</sup>, Tingting Cao<sup>3,4</sup>, Jianjun Cheng<sup>2,3,5\*</sup>, Rui Sun<sup>3,5\*</sup>

<sup>1</sup>Department of Materials Science, Fudan University, Shanghai 200433, China

<sup>2</sup>Research Center for Industries of the Future, Westlake University, Hangzhou, Zhejiang 310030, China

<sup>3</sup>School of Engineering, Westlake University, Hangzhou, Zhejiang 310023, China

<sup>4</sup>School of Material Science and Engineering, Zhejiang University, Hangzhou, Zhejiang 310023, China

<sup>5</sup>Institute of Advanced Technology, Westlake Institute for Advanced Study, Hangzhou, Zhejiang 310023, China

\*Corresponding author.

E-mail: chengjianjun@westlake.edu.cn, sunrui14@westlake.edu.cn

## Content

**Figure S1:** Synthesis scheme of P-Ce6 and P-DBCO-Ce6

**Figure S2:** <sup>1</sup>H NMR characterization of P-Ce6 in *d6*-DMSO

**Figure S3:** MALDI-TOF characterization of P-Ce6

**Figure S4:** MALDI-TOF characterization of P-DBCO-Ce6

**Figure S5:** UV-Vis spectrum of P-Ce6

**Figure S6:** UV-Vis spectrum of P-DBCO-Ce6 in PBS

**Figure S7:** The critical micelle concentration (CMC) analysis of P-DBCO-Ce6 in PBS

**Figure S8:** The generation of different types of ROS given by P-DBCO-Ce6 and Ce6

**Figure S9:** Western blot analysis of azide glycol labeling in T24 cells

**Figure S10:** Western blot analysis of azide glycol labeling in U251 and MDA-MB-231 cells

**Figure S11:** Cell surface absorption kinetics of P-Ce6

**Figure S12:** The cell surface attachment analysis of P-Ce6 and P-DBCO-Ce6

**Figure S13:** CLSM observation of P-DBCO-Ce6 cell membrane anchoring

**Figure S14:** Phototoxicity assessment of Ce6 and P-Ce6 on T24 cells with or without AAM treatment

**Figure S15:** Dark toxicity assessment of Ce6 and P-Ce6 on T24 cells with or without AAM treatment

**Figure S16:** Phototoxicity assessment of Ce6, P-Ce6, and P-DBCO-Ce6 on MDA-MB-231 cells with or without AAM treatment

**Figure S17:** Dark toxicity assessment of Ce6, P-Ce6, and P-DBCO-Ce6 on MDA-MB-231 cells with or without AAM treatment

**Figure S18:** Phototoxicity assessment of Ce6, P-Ce6, and P-DBCO-Ce6 on U251 cells with or without AAM treatment

**Figure S19:** Dark toxicity assessment of Ce6, P-Ce6, and P-DBCO-Ce6 on U251 cells with or without AAM treatment

**Figure S20:** The intracellular ROS generation assessment of Ce6, P-Ce6, and P-DBCO-Ce6

**Figure S21:** The cell membrane oxidation analysis

**Figure S22:** Zeta potential characterization of P-Ce6 & P-DBCO-Ce6 in PBS

**Figure S23:** The AAM liposome stability assay

**Figure S24:** The AAM biosafety and tumor growth assay

**Figure S25:** Illustration of tumors harvested on day 21 after AAM or PBS administration

**Figure S26:** General illustration of T24-bearing mice on day 16 after PDT treatment

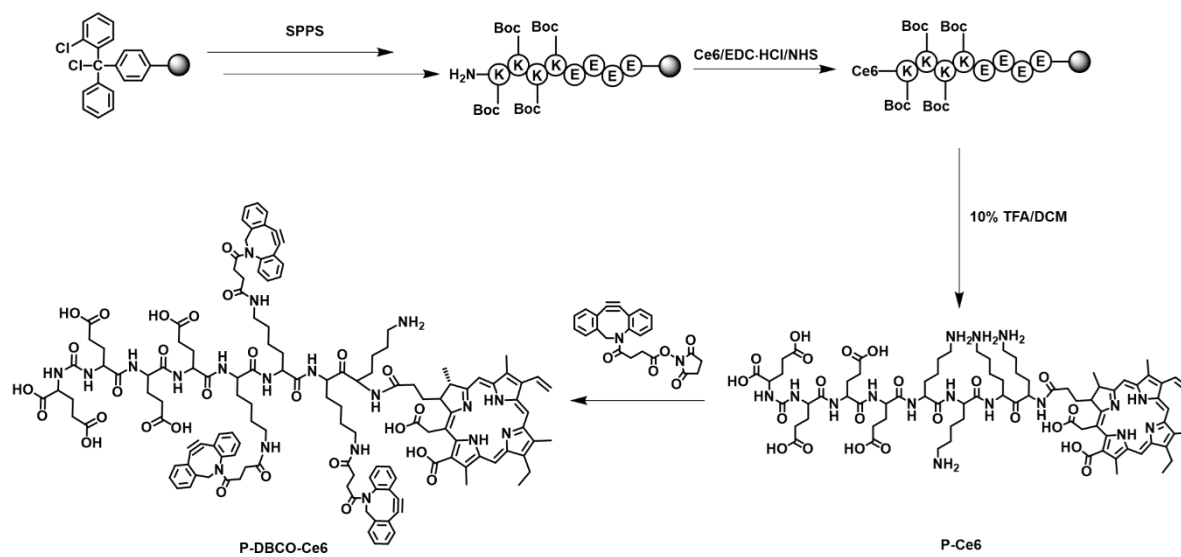

**Figure S1.** Synthesis scheme of P-Ce6 and P-DBCO-Ce6.

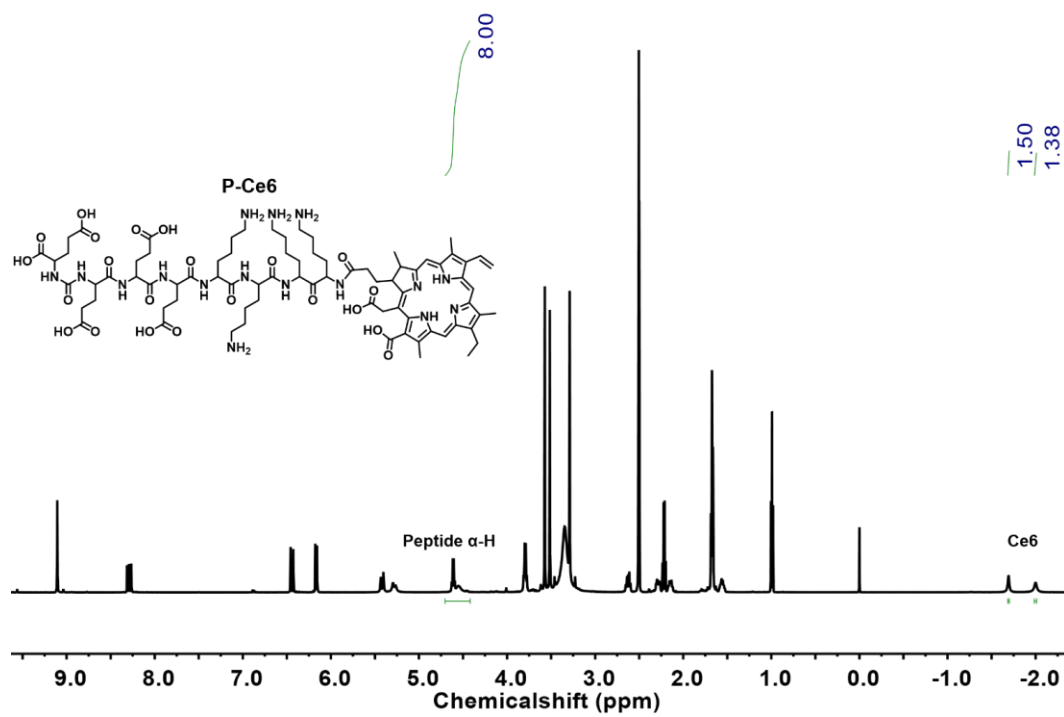

**Figure S2.** <sup>1</sup>H NMR Characterization of P-Ce6 in *d*<sub>6</sub>-DMSO.



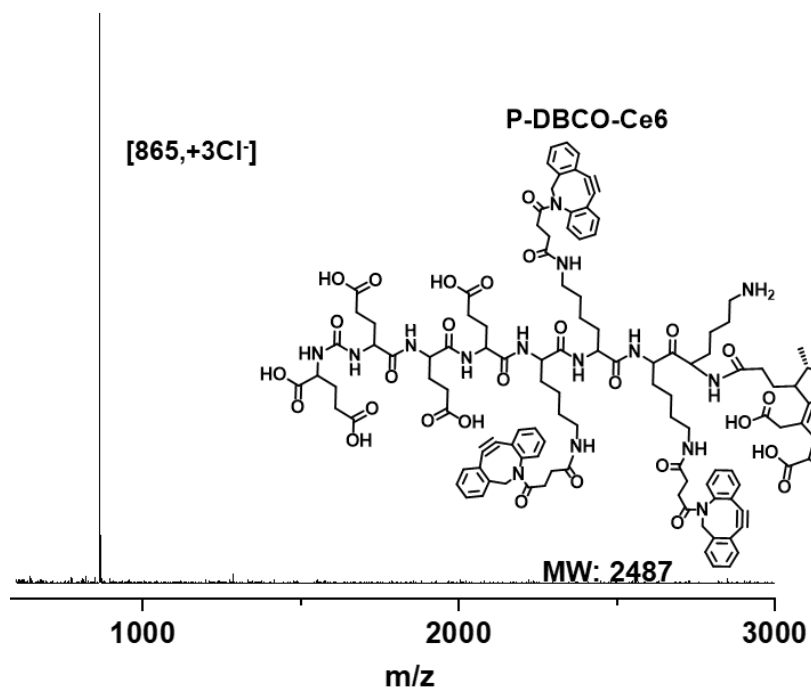

**Figure S4.** MALDI-TOF analysis of P-DBCO-Ce6 with DHB matrix under LN model.

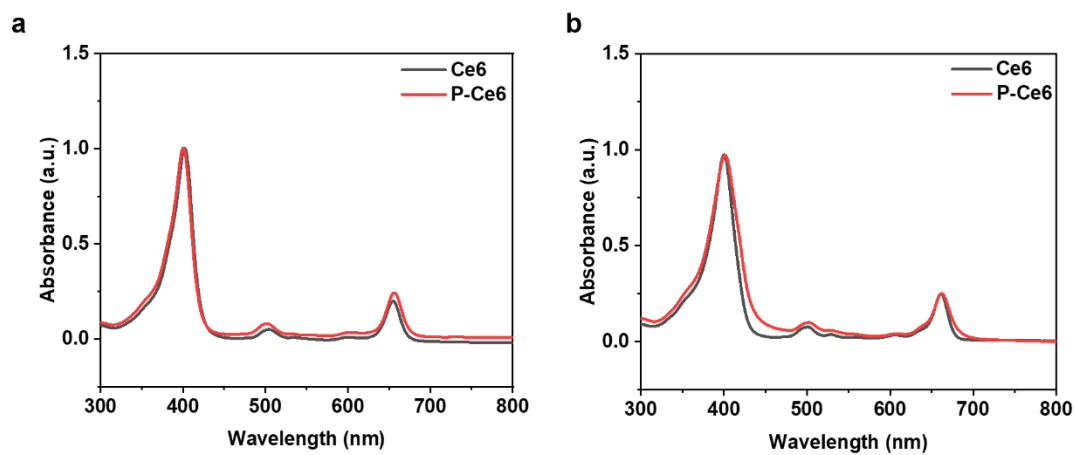

**Figure S5.** UV-Vis spectrum characterization of P-Ce6 in a) PBS and b) Methanol.

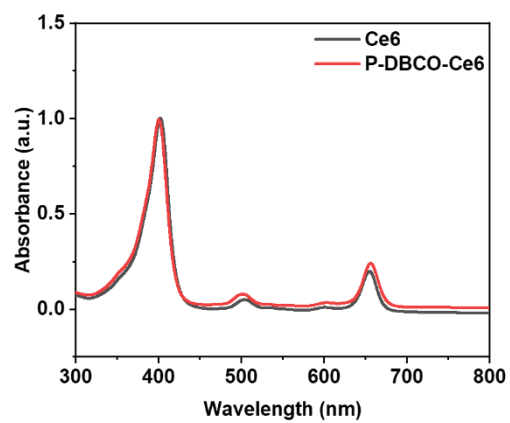

**Figure S6.** UV-Vis spectrum characterization of P-DBCO-Ce6 in PBS.



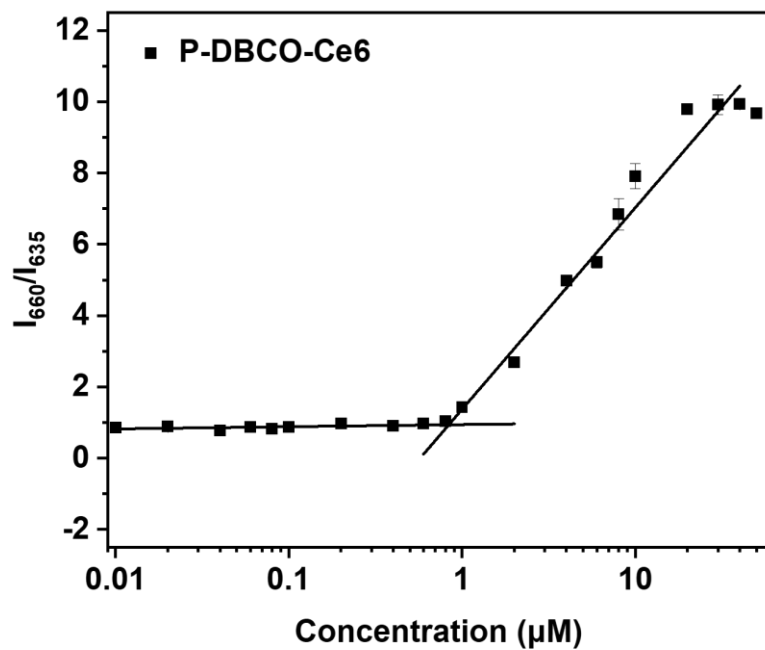

**Figure S7.** The critical micelle concentration (CMC) analysis of P-DBCO-Ce6 in PBS.

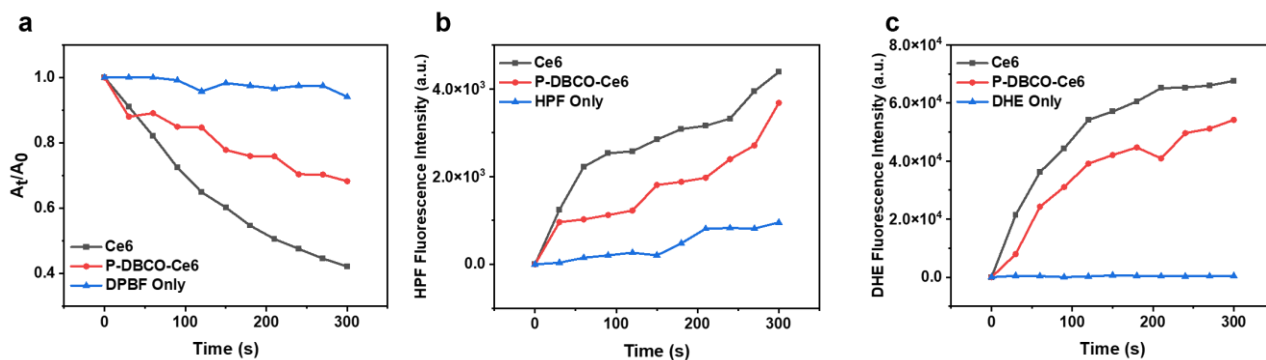

**Figure S8.** The generation of different types of reactive oxygen species (ROS) given by P-DBCO-Ce6 and Ce6, as detected by the corresponding probe. a) Degradation of DPBF, indicating the generation of singlet oxygen ( $^1O_2$ ) by P-DBCO-Ce6 and Ce6 under laser irradiation for various time intervals; b) Generation of hydroxyl radicals ( $\cdot OH$ ) detected by HPF under laser irradiation; c) Time-dependent generation of superoxide anions ( $O_2^{\cdot -}$ ) upon laser irradiation, as detected with DHE.

**a**

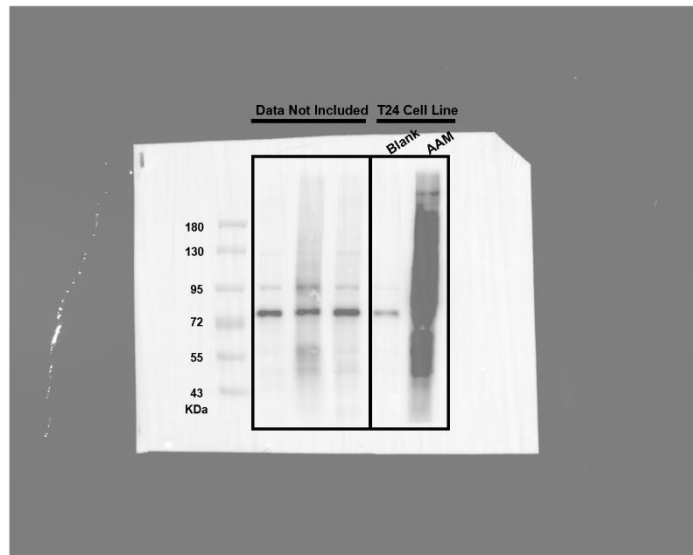

**b**

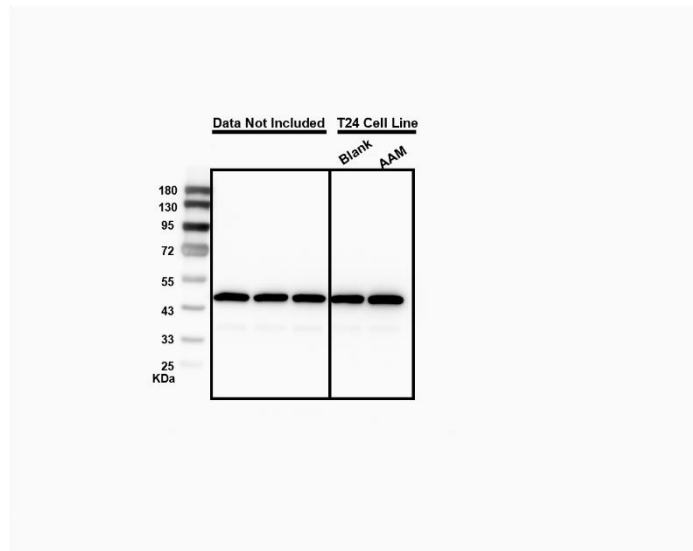

**Figure S9.** Western blot analysis of azide glycol labeling in T24 cells. a) Azide glycol labeling result; b) Actin of the corresponding sample.

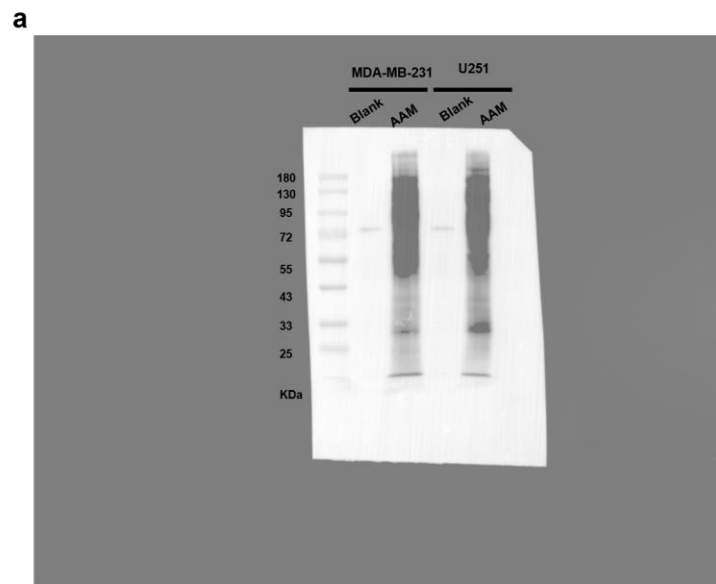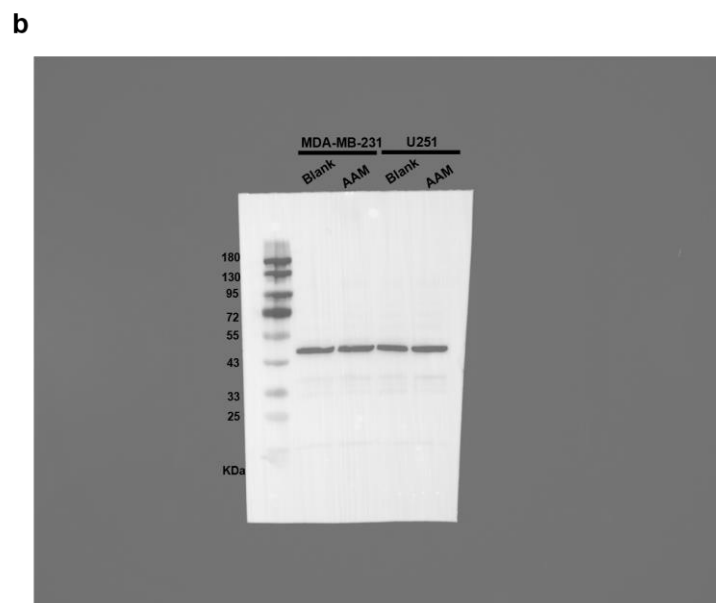

**Figure S10.** Western blot analysis of azide glycol labeling in U251 and MDA-MB-231 cells. a) Azide glycol labeling result; b) Actin of corresponding sample.

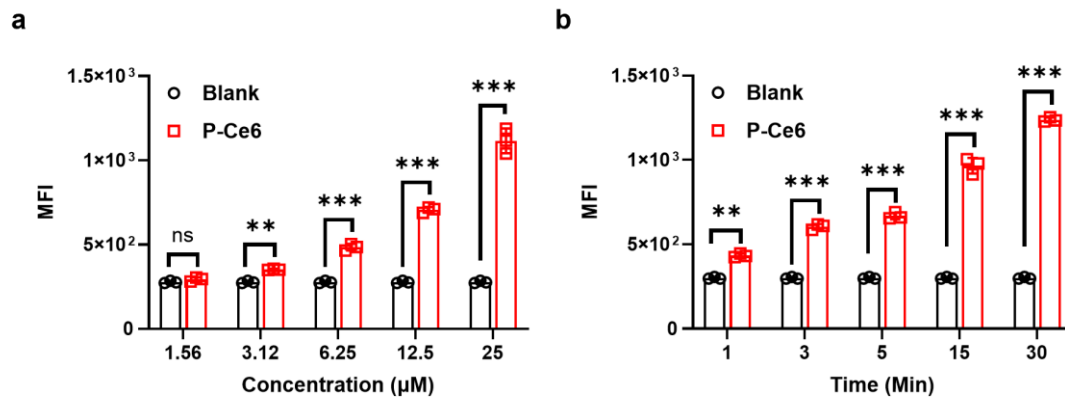

**Figure S11.** Cell surface absorption kinetics of P-Ce6 in T24 cells. a) The concentration-dependent cell attachment kinetic of P-Ce6, P-Ce6 incubated with cells for 30min; b) The time-dependent cell attachment kinetic of P-Ce6 (25  $\mu\text{M}$ ) (\* $p < 0.05$ , \*\* $p < 0.01$ , \*\*\* $p < 0.001$ ).

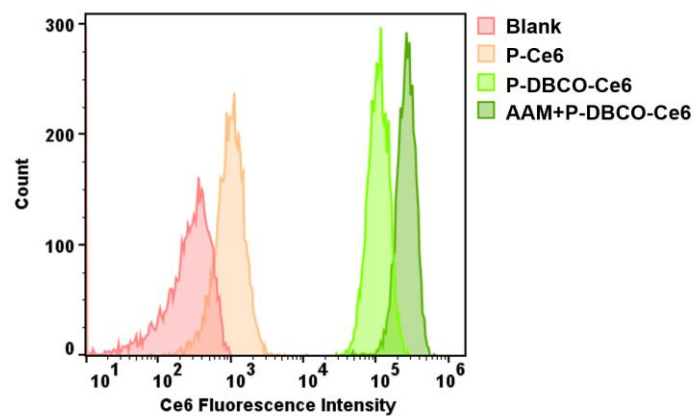

**Figure S12.** The cell surface attachment analysis of P-Ce6 and P-DBCO-Ce6. T24 cells were incubated with 25  $\mu$ M of P-Ce6 or P-DBCO-Ce6 for 30 min under 37  $^{\circ}$ C.

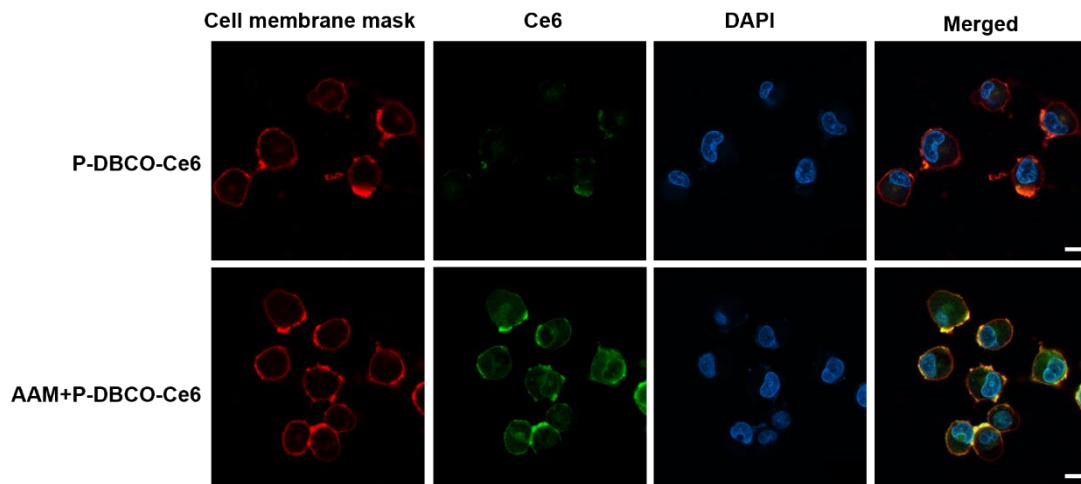

**Figure S13.** CLSM observation of P-DBCO-Ce6 cell membrane anchoring. T24 cells with or without AAM treatment were incubated with 50  $\mu\text{M}$  of P-DBCO-Ce6 for 1 h under 37  $^{\circ}\text{C}$ . Scale bar: 10 $\mu\text{m}$ .

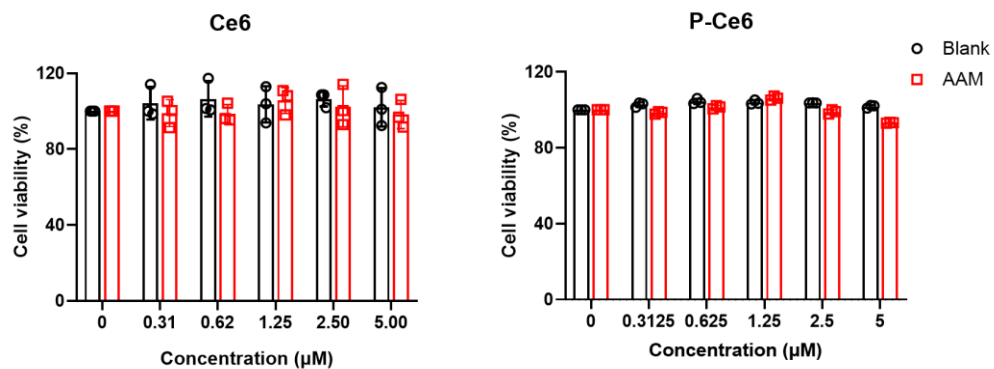

**Figure S14.** Phototoxicity assessment of Ce6 and P-Ce6 on T24 cells with or without AAM treatment. For phototoxicity, upon 660 nm laser irradiation, 10 mW/cm<sup>2</sup>, 5 min.



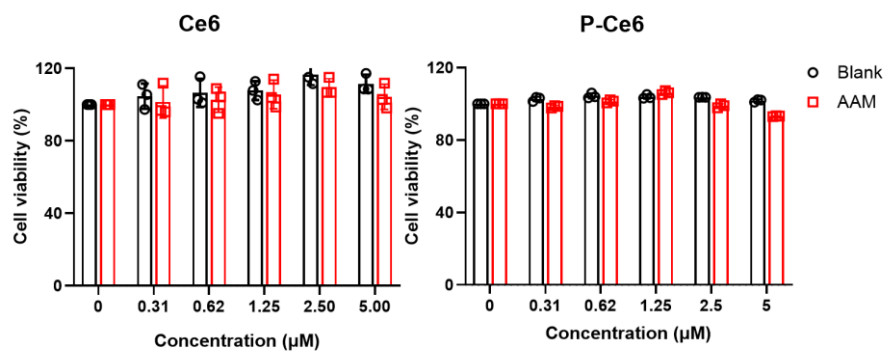

**Figure S15.** Dark toxicity assessment of Ce6 and P-Ce6 on T24 cells with or without AAM treatment.

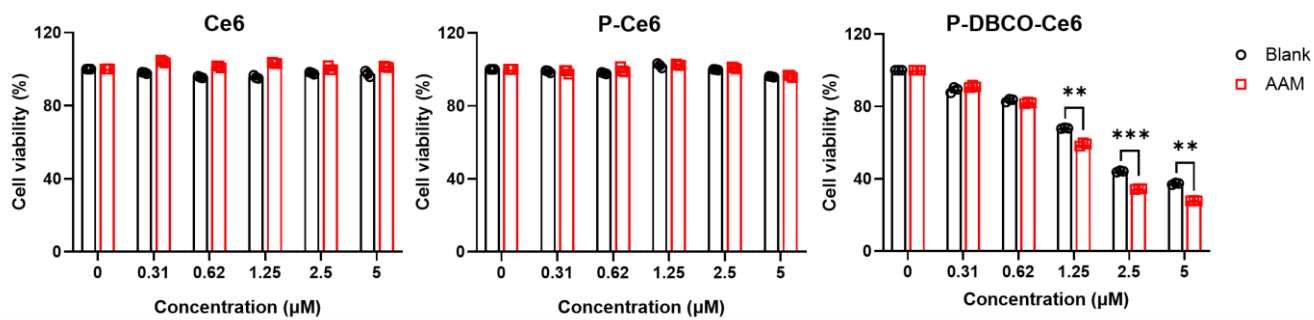

**Figure S16.** Phototoxicity assessment of Ce6, P-Ce6, and P-DBCO-Ce6 on MDA-MB-231 cells with or without AAM treatment. For phototoxicity, upon 660 nm laser irradiation, 10 mW/cm<sup>2</sup>, 5 min (\*p<0.05, \*\*p<0.01, \*\*\*p<0.001).

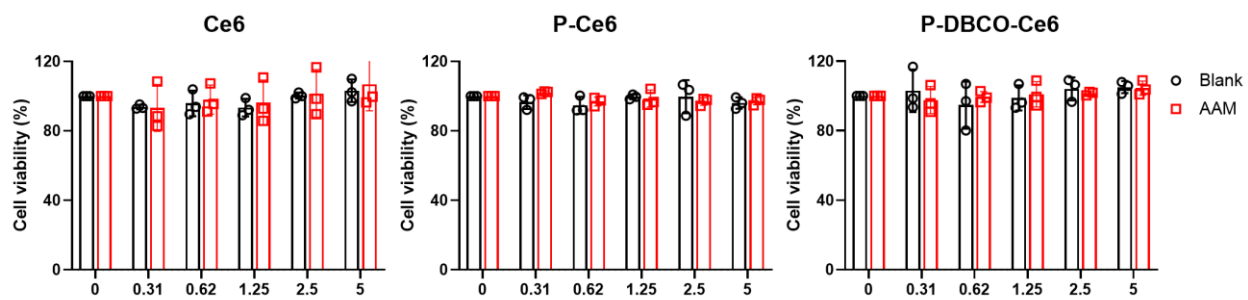

**Figure S17.** Dark toxicity assessment of Ce6, P-Ce6, and P-DBCO-Ce6 on MDA-MB-231 cells with or without AAM treatment.

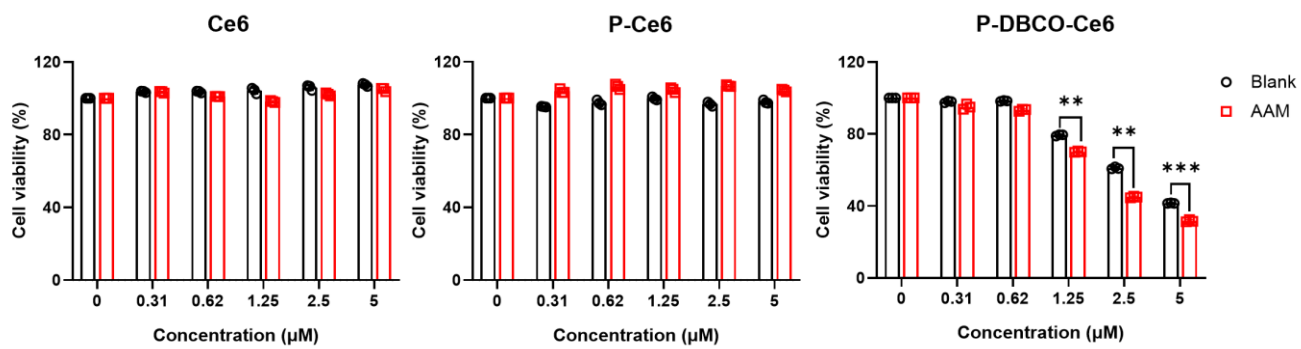

**Figure S18.** Phototoxicity assessment of Ce6, P-Ce6, and P-DBCO-Ce6 on U251 cells with or without AAM treatment. For phototoxicity, upon 660 nm laser irradiation, 10 mW/cm<sup>2</sup>, 5 min (\*p<0.05, \*\*p<0.01, \*\*\*p<0.001).

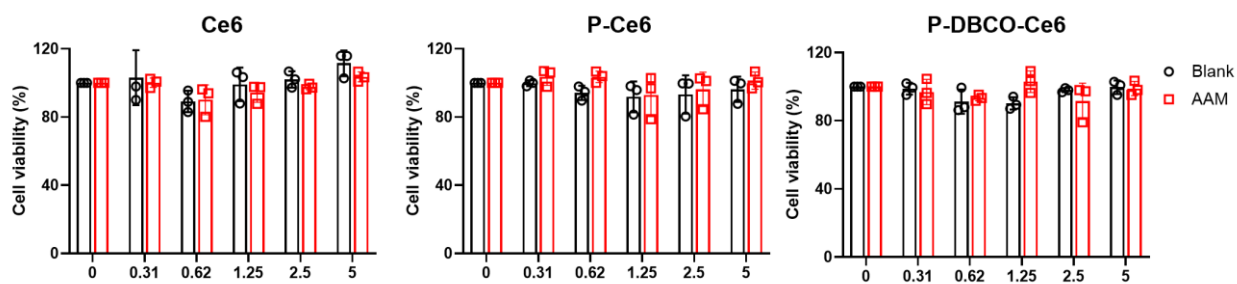

**Figure S19.** Dark toxicity assessment of Ce6, P-Ce6, and P-DBCO-Ce6 on U251 cells with or without AAM treatment.

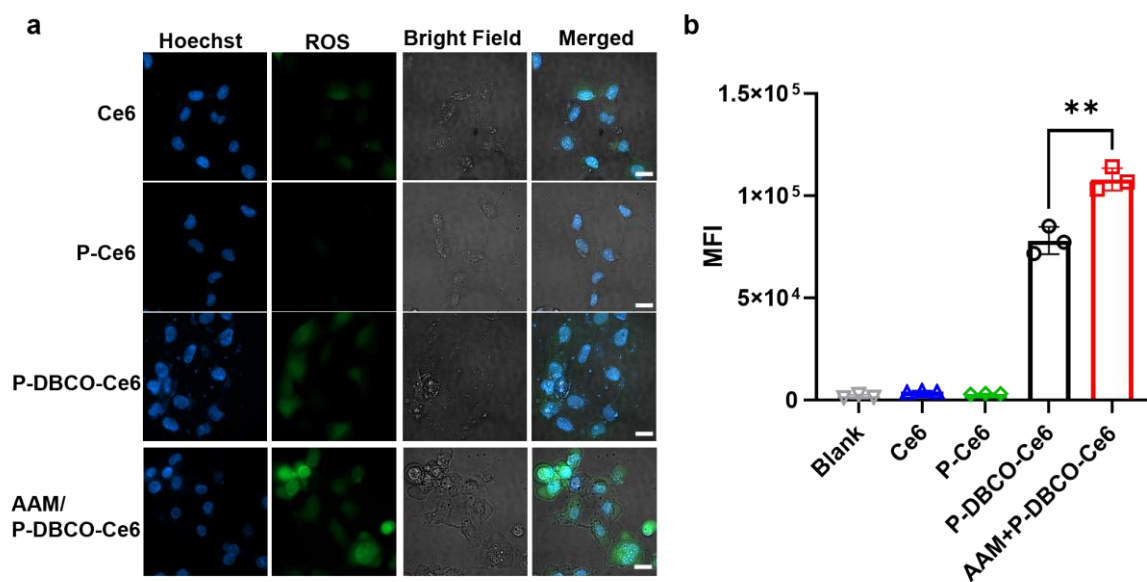

**Figure S20.** The intracellular ROS generation detected by a) ROS fluorescence probe imaged with CLSM and quantitatively analyzed with b) flow cytometry. T24 cells with or without AAM treatment were incubated with P-DBCO-Ce6, P-Ce6 or Ce6 (1  $\mu$ M, 5 min), ROS detection was conducted after laser irradiation (\* $p$ <0.05, \*\* $p$ <0.01).

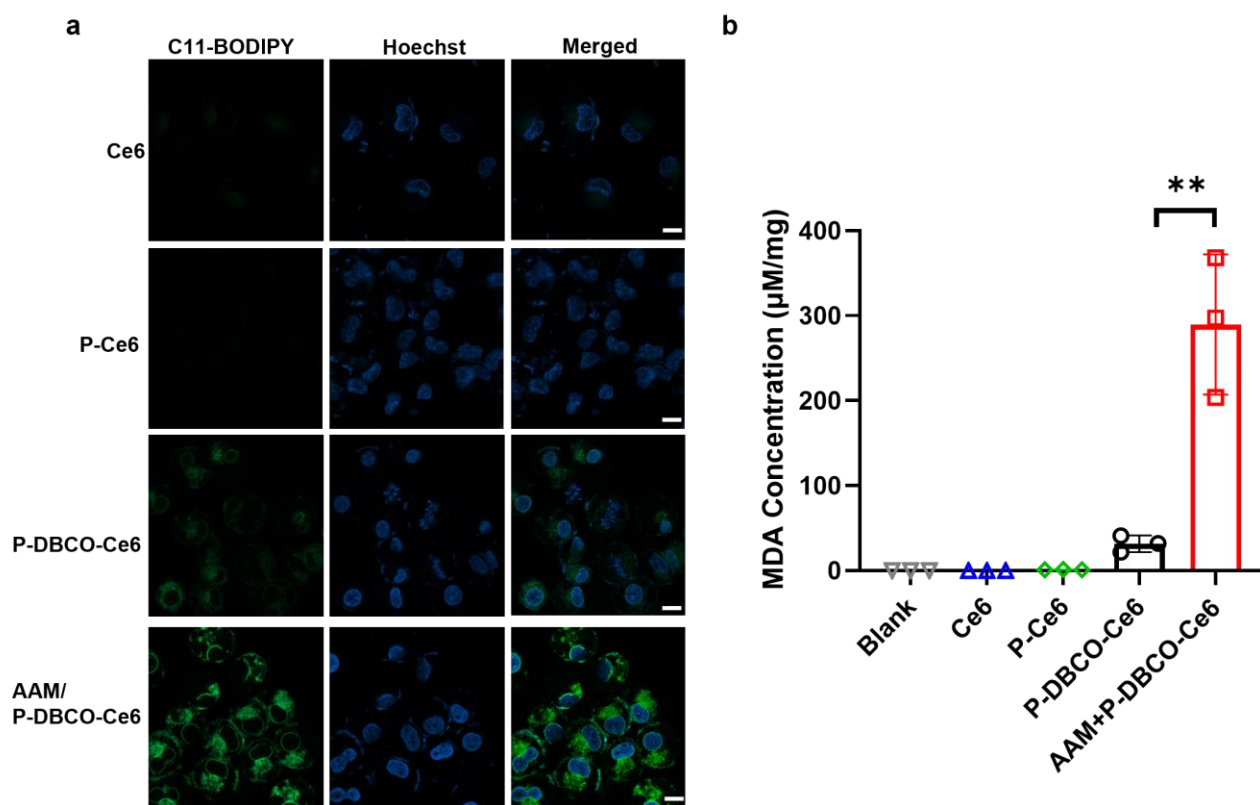

**Figure S21.** The cell membrane oxidation analysis. a) CLSM observation of C11-BODIPY excitation by ROS, generated from cell surface attached PS (25  $\mu\text{M}$ , 10 min) under laser irradiation (40  $\text{mW}/\text{cm}^2$ , 10 min); b) Intracellular MDA levels of cells with different treatment after laser irradiation (\* $p < 0.05$ , \*\* $p < 0.01$ ).

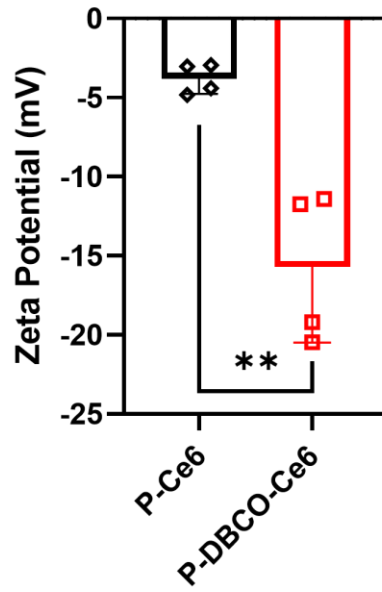

**Figure S22.** Zeta potential characterization of P-Ce6 & P-DBCO-Ce6 in PBS (\* $p < 0.05$ , \*\* $p < 0.01$ ).



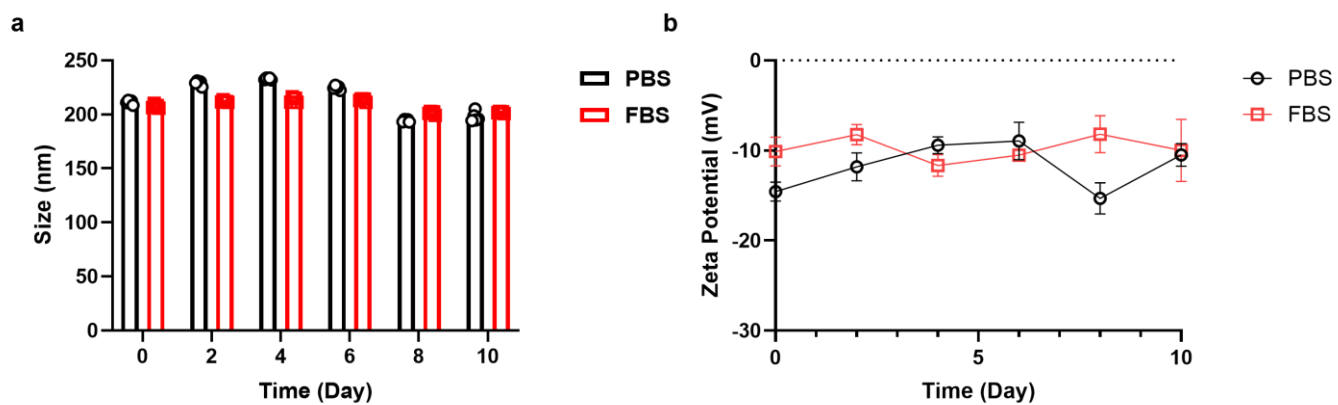

**Figure S23.** The AAM liposome stability assay: a) The size variation of AAM liposomes stored in PBS or 10% FBS at 4°C over different time intervals; b)  $\zeta$ -potential changes of AAM liposomes under the same storage conditions.

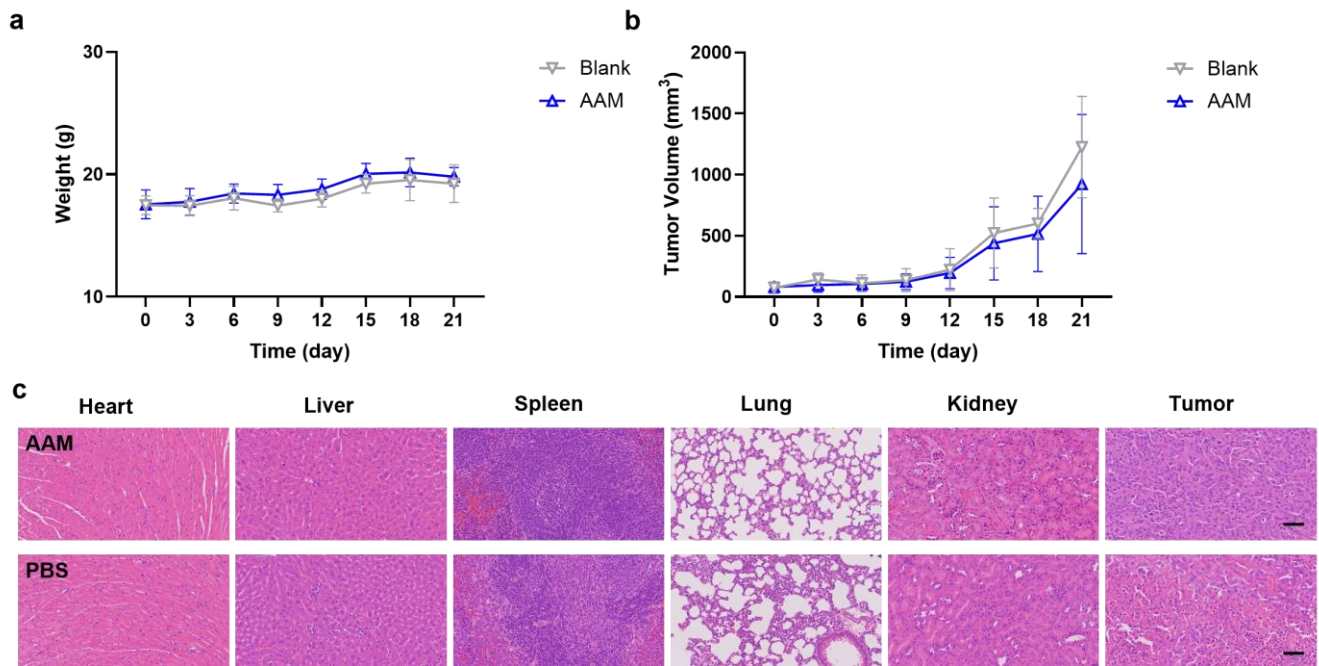

**Figure S24.** The AAM biosafety and tumor growth assay: a) The body weight of mice after received AAM or PBS; b) The tumor growth curve after administrate AAM or PBS; c) H&E staining of the major organ (heart, liver, spleen, lung and kidney) on day 21 after mice administrate AAM or PBS. Scale bar: 100 $\mu$ m.

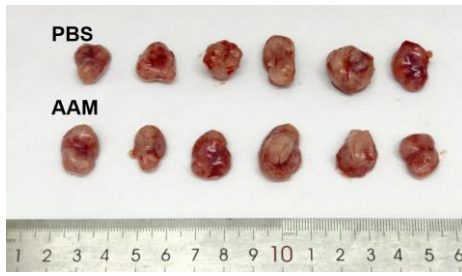

**Figure S25.** Illustration of tumors harvested on day 21 after AAM or PBS administration.

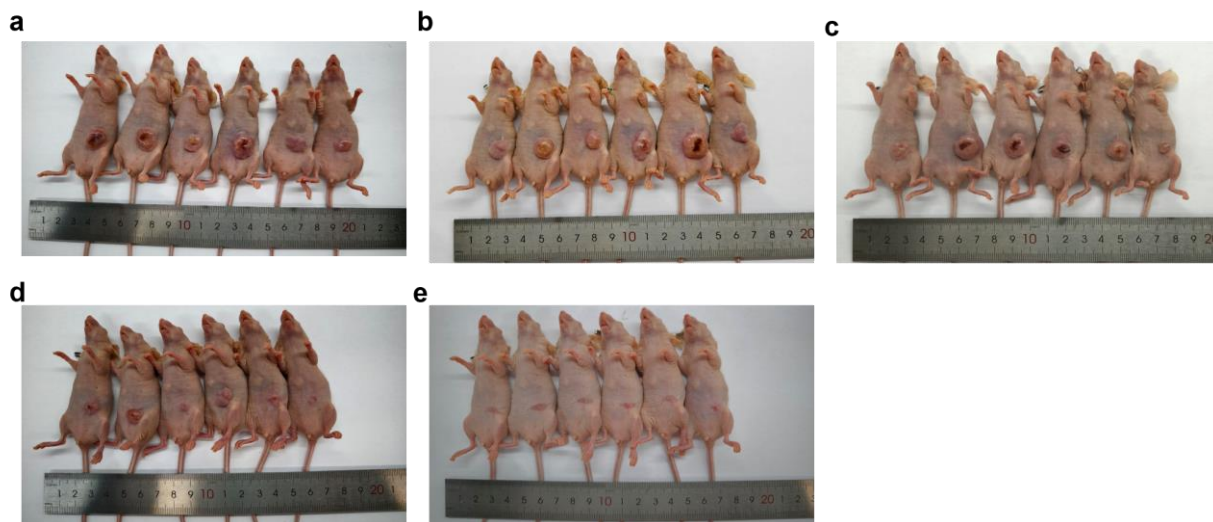

**Figure S26.** General illustration of T24-bearing mice on day 16 after PDT treatment. a) PBS; b) Ce6; c) P-Ce6; d) P-DBCO-Ce6; e) AAM + P-DBCO-Ce6.
